# Supplementary material
Source: MDPI journal article supplement (https://www.mdpi.com/2076-3417/9/20/4299)
Supplement: s1 [file s1]

# Characterization and Antibacterial Activity of Four Antarctic Liver-expressed Antimicrobial Peptides from Antarctic Fish

Shweta Bharat Borkar, Sondavid K. Nandanwar, Jun Hyuck Lee and Hak Jun Kim

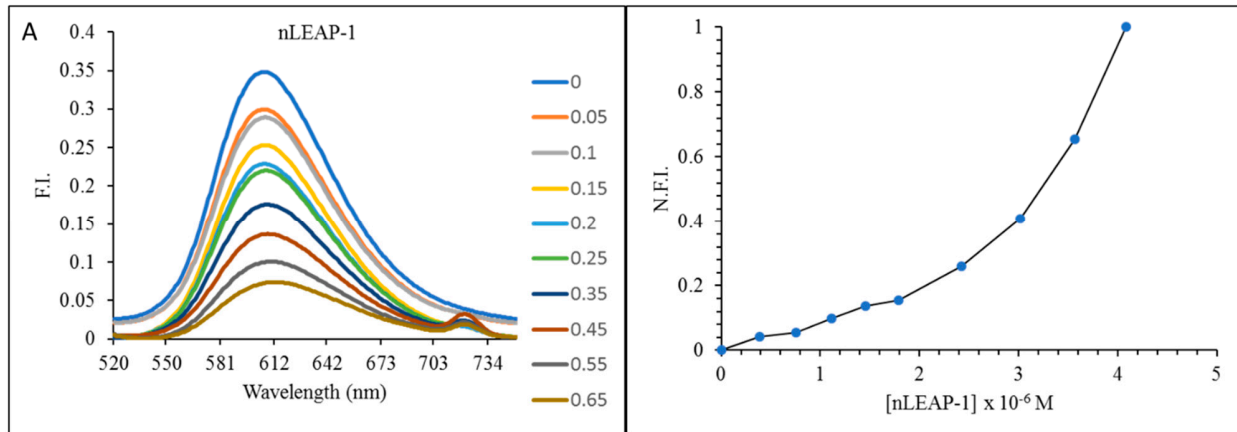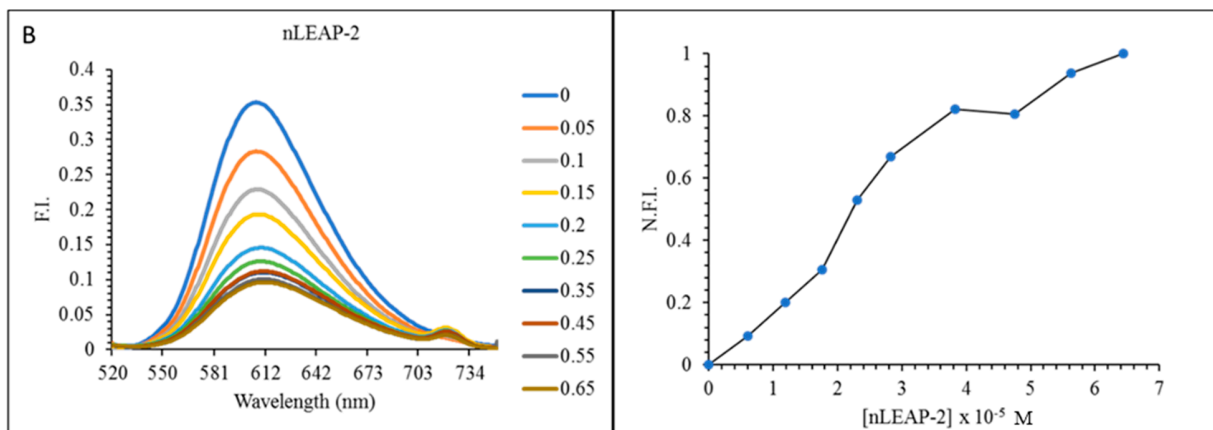

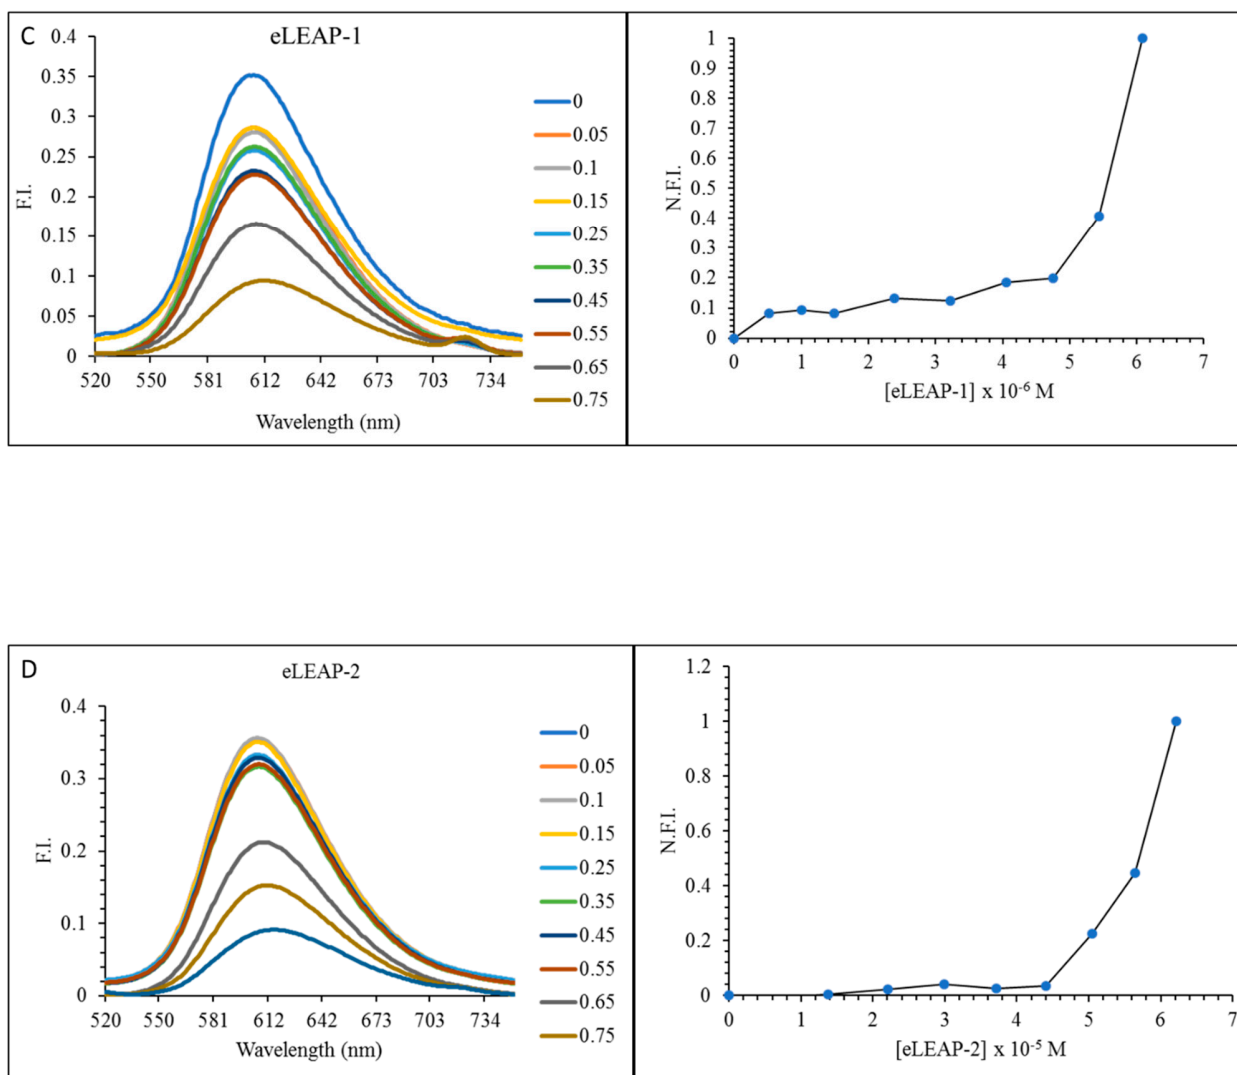

Figure S1. Emission spectra of Ethidium bromide (5  $\mu\text{M}$ ) bound to the DNA (20  $\mu\text{M}$ ) in the presence of varying concentrations of LEAPs from 0 to 18  $\mu\text{M}$  at the interval of 10 minutes. A) nLEAP-1, B) nLEAP-2, C) eLEAP-1 and D) eLEAP-2. The graph represents the Stern-Volmer plot of normalized fluorescence intensity (N.F.I.) versus concentration of peptide [LEAPs] (M) for the calculation of dissociation constant ( $K_d$ ). The calculated  $K_d$  values of nLEAP-1, nLEAP-2, eLEAP-1, and eLEAP-2 are 4.1, 6.44, 6.08, and 6.21  $\mu\text{M}$ , respectively.
